# Supplementary material for: Thousands of microbial genomes shed light on interconnected biogeochemical processes in an aquifer system
Source: PubMed Central journal article supplement (PMC5079060; doi:10.1038/ncomms13219), 2016-10-24
Supplement: ncomms13219-s1.pdf [file ncomms13219-s1.pdf]

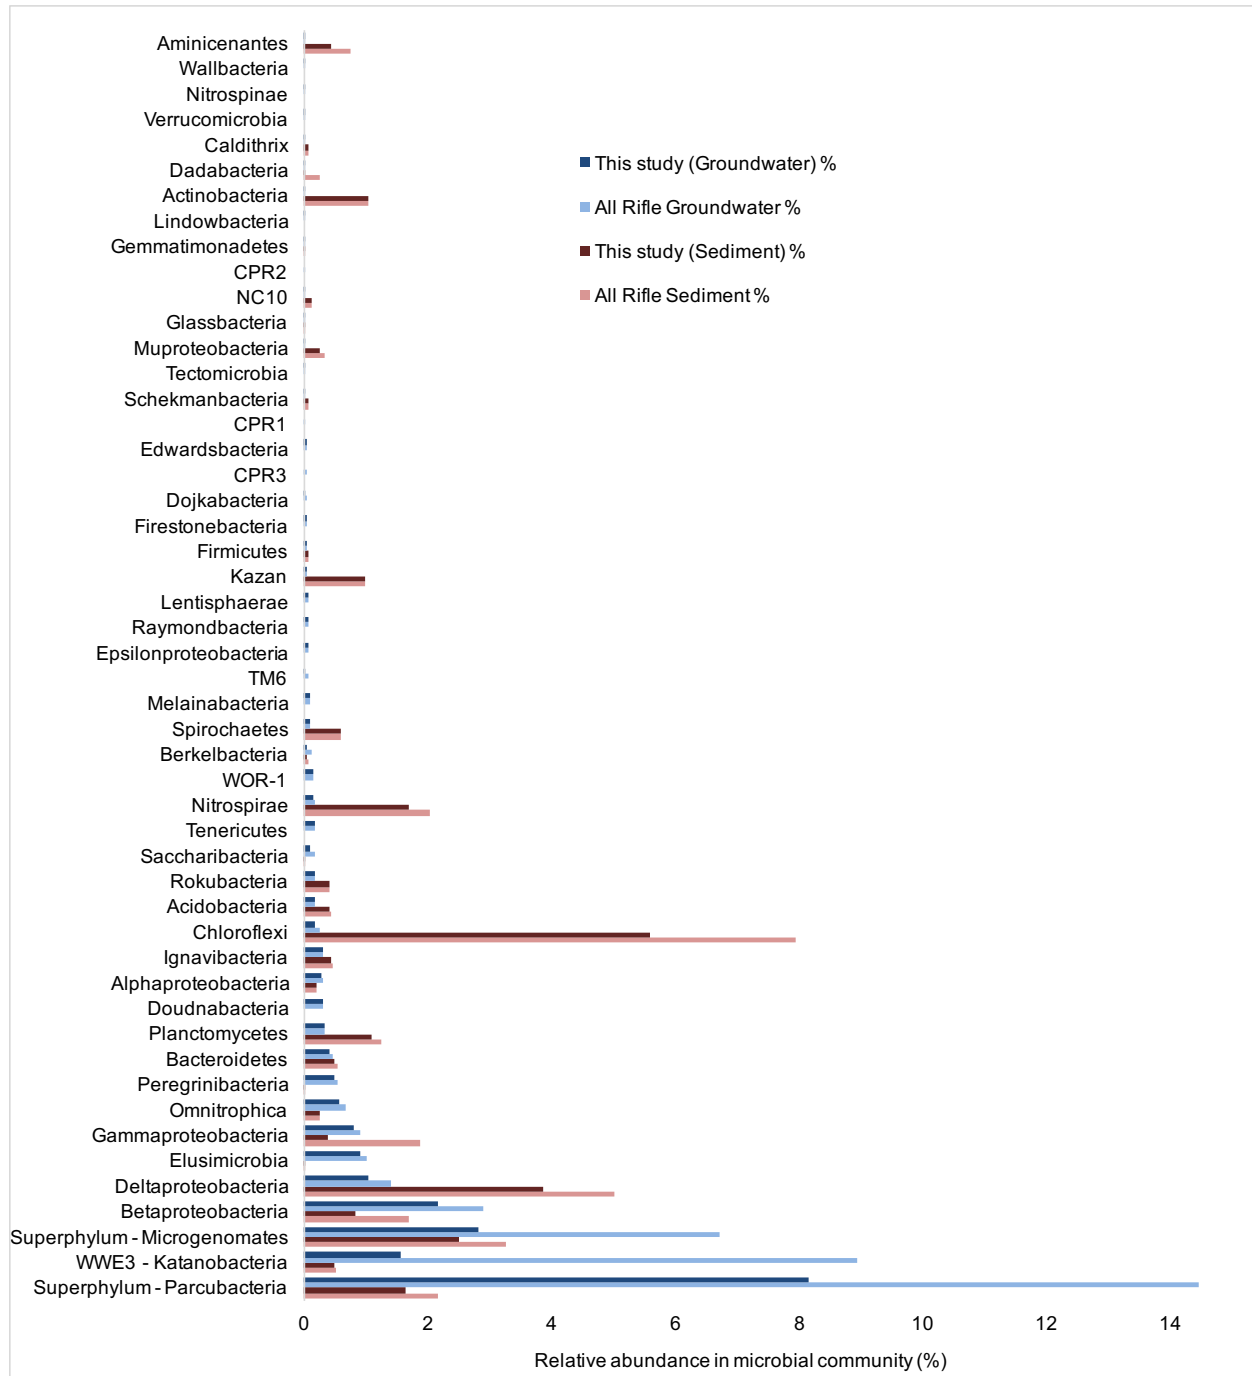

**Supplementary Figure 1: Comparison of relative abundances of phyla described in this study with all high-quality genomes recovered from groundwater and sediment.**

Abundances were calculated using the ribosomal protein S3 (RpS3) clustered at 99% and linked to individual genomes. Only top 30 phyla are shown.

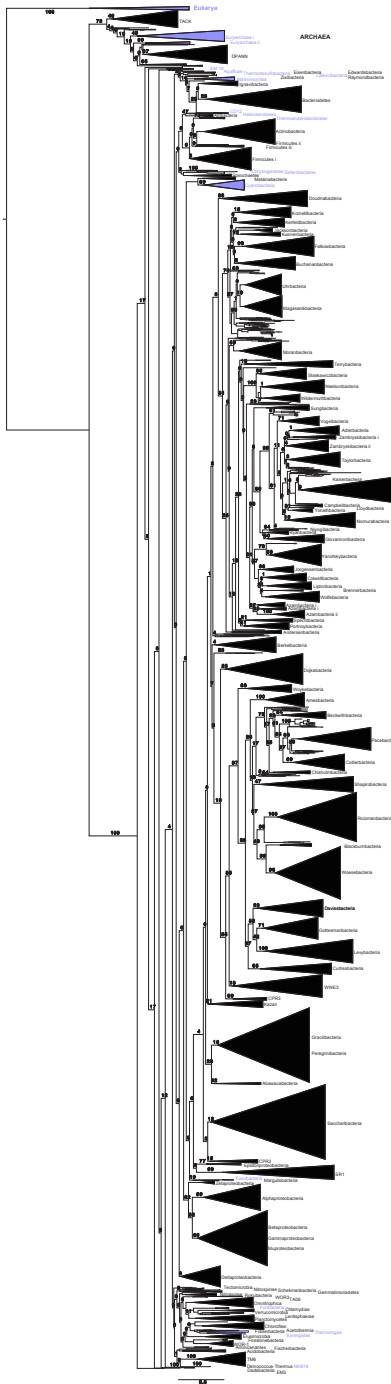

**Supplementary Figure 2. Phylogenetic analysis of 16S rRNA genes inferred by maximum-likelihood implemented with RAxML.** The tree is collapsed at the phylum-level. Colors of the wedges indicate the following: Black: Phyla identified at Rifle; Blue: Phyla not identified at Rifle. Not all are bootstrap values are shown. The phylogenetic inference configurations with detailed branch support values are provided in nexus format in Supplementary Data 13

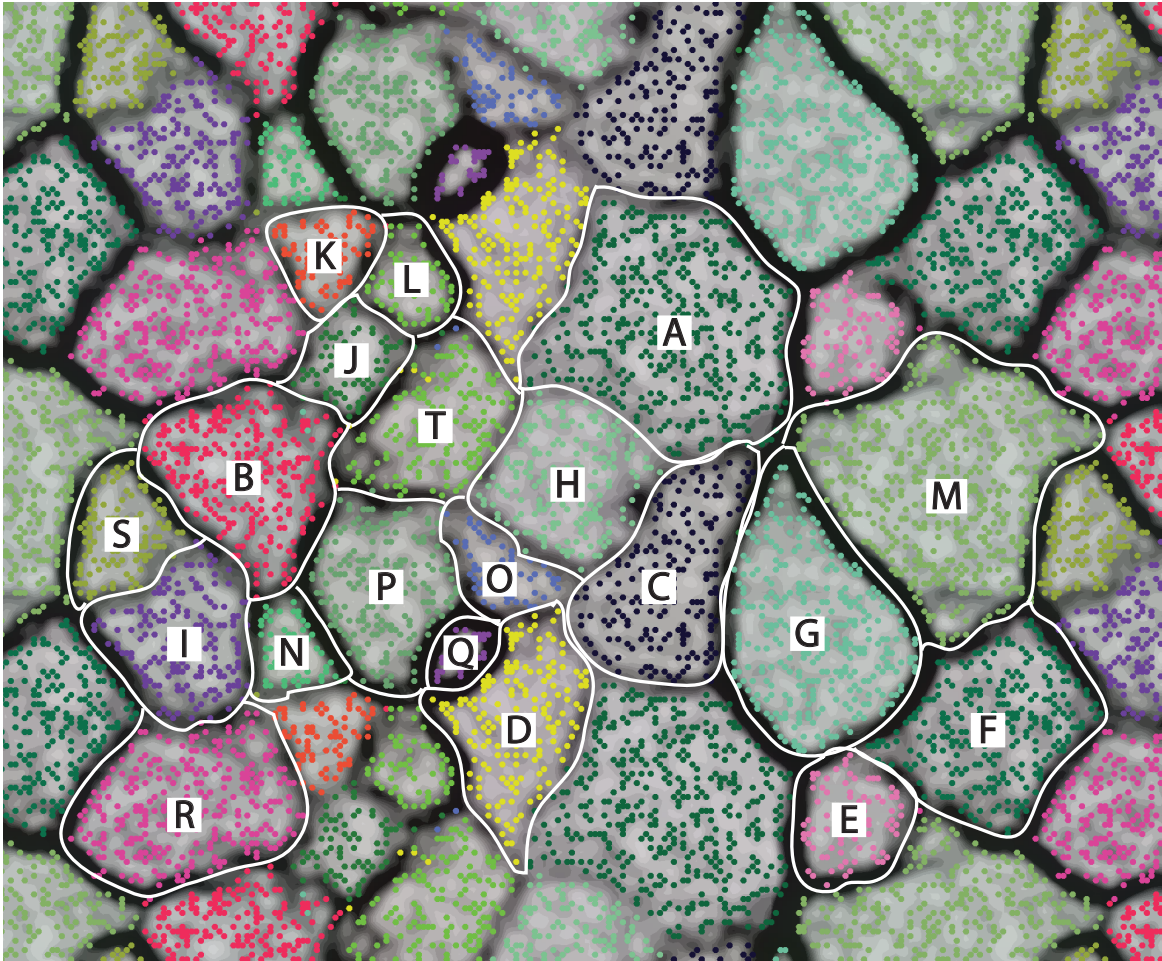

**Supplementary Figure 3. Validation of 20 high-quality draft genomes chosen at random using tetranucleotide sequence composition.** Each colored point represents a 5-10 kb genome fragment. Background color is dictated by tetranucleotide frequency variance between data points with grey indicating similarity and black demarcating different genomes. White boxes delineate the genomes. The letters indicate individual genomes as follows:

A, Bacteroidetes bacterium GWA2\_40\_15; B, Gallionellales bacterium GWA2\_54\_124 ; C, *Candidatus* Firestonebacteria bacterium GWA2\_43\_8; D, *Candidatus* Schekmanbacteria bacterium GWA2\_38\_11; E, *Omnitrophica* WOR\_2 bacterium GWA2\_53\_43; F, Elusimicrobia bacterium GWB2\_63\_22; G, *Candidatus* Wallbacteria bacterium GWC2\_49\_35; H, *Candidatus* Melainabacteria bacterium GWF2\_37\_15; I, *Candidatus* Fraserbacteria bacterium RBG\_16\_55\_9; J, *Candidatus* Doudnabacteria bacterium RIFCSPHIGHO2\_01\_FULL\_46\_24; K, *Candidatus* Doudnabacteria bacterium RIFCSPHIGHO2\_01\_FULL\_50\_11; L, candidate division Kazan bacterium RIFCSPLOWO2\_01\_FULL\_45\_19; M, Acidobacteria bacterium RIFCSPLOWO2\_02\_FULL\_65\_29; N, *Candidatus* Kaiserbacteria bacterium RIFCSPLOWO2\_12\_FULL\_50\_28; O, candidate division WWE3 bacterium RIFCSPLOWO2\_12\_FULL\_36\_10; P, *Sulfurimonas* sp. RIFOXYB12\_FULL\_35\_9; Q, candidate division WS6 bacterium RIFOXYB1\_FULL\_33\_14; R, Spirochaetes bacterium RIFOXYC1\_FULL\_54\_7; S, *Candidatus* Peribacter riflensis; T, *Candidatus* Falkowbacteria bacterium RIFOXYD2\_FULL\_34\_120.
